# Supplementary material for: Barriers and facilitators of successful deprescribing as described by older patients living with frailty, their informal carers and clinicians: a qualitative interview study
Source: HighWire-hosted journal article supplement (doi:10.1136/bmjopen-2021-054279), 2022-03-01
Supplement: bmjopen-2021-054279supp002_data_supplement.pdf [file bmjopen-2021-054279supp002_data_supplement.pdf]

**Qualitative interview: Patients (First interview): v.1.4**

| <b>Qualitative interview: Patients: Interview 1</b>                          |                                                                                                                                                                                                                                                                                                                                                                                              |
|------------------------------------------------------------------------------|----------------------------------------------------------------------------------------------------------------------------------------------------------------------------------------------------------------------------------------------------------------------------------------------------------------------------------------------------------------------------------------------|
| <b>Topic</b>                                                                 | <b>Questions</b>                                                                                                                                                                                                                                                                                                                                                                             |
| <b>Deprescribing: Process</b>                                                | I know you had one/a number of your regular medicines stopped by your HCP recently. Can you please tell me about this? Why did it happen, how and which medicine(s)? Whose decision was it to begin with? [If healthcare professional] Did you agree with the decision at the beginning?                                                                                                     |
|                                                                              | Did you feel you received enough information and support by your healthcare professional to make you feel comfortable about stopping these medicines? What went well and what could have gone better (during consultation)?                                                                                                                                                                  |
|                                                                              | Did you feel like you had a say in this decision? [Alternative] Were you given the opportunity to fully discuss your thoughts and explore your options?                                                                                                                                                                                                                                      |
|                                                                              | Do you think stopping a medicine is an easy decision to make? [If not] What makes it difficult to stop a medicine from your perspective? What do you think makes it difficult for your HCP? Are there any aspects which may facilitate this process? What do you think could be done to help stopping problematic medicines effectively?                                                     |
| <b>Deprescribing: Terminology</b>                                            | Have you ever heard of the term deprescribing? Do you agree with the term? What comes to mind when you hear the word deprescribing? [Probe] what are your concerns? Would you rather call it something else? [If so] why? What makes you feel that way?                                                                                                                                      |
|                                                                              | What would you call the process of stopping medicines?                                                                                                                                                                                                                                                                                                                                       |
| <b>Attitudes, beliefs, expectations about medicines and polypharmacy</b>     | What are the challenges you experience with the daily management of your medicines? How well do you think you understand the medicines they you to take? What strategies do you use to ensure you take your medicines correctly?                                                                                                                                                             |
| <b>Patient-prescriber communication and relationship and decision-making</b> | Do you feel that you are involved in discussions and decisions about your medicines or do you usually defer decisions to your healthcare professional(s)? [if deferral] Why do you think this happens? And are you happy that decisions are deferred to your HCP?                                                                                                                            |
|                                                                              | When making decisions about your medicines, do you often talk to your HCP about your personal care goals and priorities, particularly if you disagree with a decision? Does your HCP ask what your views are on the subject before making a decision? Have you ever disagreed with a decision made by your HCP about your medicines? [If so] Can you talk about it and what the outcome was? |
|                                                                              | Do you feel supported and listened to by your healthcare professional(s) when you have questions or concerns about your medicines? [If not] Why not? Can you give me a recent example that made you feel this way?                                                                                                                                                                           |
| <b>Final thoughts and considerations</b>                                     | <b>Is there any other information, thought or concern you would like to share with me before we end this interview?</b>                                                                                                                                                                                                                                                                      |
| <b>THANK YOU FOR TAKING PART IN THIS STUDY</b>                               |                                                                                                                                                                                                                                                                                                                                                                                              |

Interview schedule: Patients (1<sup>st</sup> Interview) v.1.4  
December 6<sup>th</sup>, 2017
