# Supplementary material for: Barriers and facilitators of successful deprescribing as described by older patients living with frailty, their informal carers and clinicians: a qualitative interview study
Source: HighWire-hosted journal article supplement (doi:10.1136/bmjopen-2021-054279), 2022-03-01
Supplement: bmjopen-2021-054279supp004_data_supplement.pdf [file bmjopen-2021-054279supp004_data_supplement.pdf]

**Qualitative interview: Informal carers (First interview): v.1.1**

| <b>Qualitative interview: Informal carers. Interview 1</b>                   |                                                                                                                                                                                                                                                                                                                                                                                                                                           |
|------------------------------------------------------------------------------|-------------------------------------------------------------------------------------------------------------------------------------------------------------------------------------------------------------------------------------------------------------------------------------------------------------------------------------------------------------------------------------------------------------------------------------------|
| <b>Topic</b>                                                                 | <b>Questions</b>                                                                                                                                                                                                                                                                                                                                                                                                                          |
| <b>Deprescribing: Process</b>                                                | I know the person you help with their medicines had one/a number of your regular medicines stopped by their HCP recently. Can you please tell me about this? Whose decision was it to begin with? [If healthcare professional] Did you agree with the decision? What are your concerns (if any)? Do you think your concerns are the same or different than those of your relative/friend?                                                 |
|                                                                              | Did you feel you and your relative/friend received enough information and support from the healthcare professional to make you feel comfortable about stopping these medicines? What went well and what could have gone better (during consultation)?                                                                                                                                                                                     |
|                                                                              | Were you given the opportunity to fully discuss your thoughts and explore your options?                                                                                                                                                                                                                                                                                                                                                   |
|                                                                              | Do you think stopping a medicine is an easy decision to make? [If not] What makes it difficult to stop a medicine from your perspective? What do you think makes it difficult for your HCP? What do you think could be done to help stopping problematic medicines effectively?                                                                                                                                                           |
| <b>Deprescribing: Terminology</b>                                            | Have you ever heard of the term deprescribing? Do you agree with the term? What comes to mind when you hear the word deprescribing? [Probe] what are your concerns? Would you rather call it something else? [If so] why? What makes you feel that way?                                                                                                                                                                                   |
|                                                                              | What would you call the process of stopping medicines?                                                                                                                                                                                                                                                                                                                                                                                    |
| <b>Attitudes, beliefs, expectations about medicines and polypharmacy</b>     | What are the challenges you and your relative/friend experience with his/her medicines? How well do you think you think your friend/relative understands the medicines he/she takes? What strategies do you use to ensure your friend/relative takes his/her medicines correctly?                                                                                                                                                         |
| <b>Patient-prescriber communication and relationship and decision-making</b> | Do you feel that you are involved in discussions and decisions about your friend/relative's medicines or do you usually defer decisions to the healthcare professional(s)? [if deferral] Why do you think this happens? And are you happy that decisions are deferred to the HCP?                                                                                                                                                         |
|                                                                              | When making decisions about your relative/friend's medicines, do you often talk to your HCP about yours and your relative/friend's personal care goals and priorities, particularly if you disagree with a decision? Does the HCP ask what your views are on the subject before making a decision? Have you ever disagreed with a decision made by your HCP about your medicines? [If so] Can you talk about it and what the outcome was? |
|                                                                              | Do you feel supported and listened to by your healthcare professional(s) when you have questions or concerns about your medicines? [If not] Why not? Can you give me a recent example that made you feel this way?                                                                                                                                                                                                                        |
|                                                                              | Do you think your care goals and priorities for your relative/friend are the same as those of his/hers? If not, how do they differ?                                                                                                                                                                                                                                                                                                       |
| <b>Final thoughts and considerations</b>                                     | <b>Is there any other information, thought or concern you would like to share with me before we end this interview?</b>                                                                                                                                                                                                                                                                                                                   |
| <b>THANK YOU FOR TAKING PART IN THIS STUDY</b>                               |                                                                                                                                                                                                                                                                                                                                                                                                                                           |
